# Supplementary material for: Threshold photoelectron spectroscopy of organosulfur radicals
Source: Royal Society of Chemistry journal article supplement (doi:10.1039/d4cp03906h), 2024-01-01
Supplement: d4cp03906h1.pdf [file d4cp03906h1.pdf]

Electronic Supplementary Information for

**Threshold Photoelectron Spectroscopy of Organosulfur Radicals**

Emil Karaev,<sup>a</sup> Dorothee Schaffner,<sup>a</sup> Marius Gerlach,<sup>a</sup> Patrick Hemberger,<sup>b</sup> AnGayle K. Vasiliou,<sup>c</sup> and Ingo Fischer\*<sup>a</sup>

<sup>a</sup> Institute of Physical and Theoretical Chemistry, University of Würzburg, Am Hubland, 97074 Würzburg, Germany. E-mail: ingo.fischer@uni-wuerzburg.de

<sup>b</sup> Paul Scherrer Institute, Villigen 5232, Switzerland, e-mail: patrick.hemberger@psi.ch

<sup>c</sup> Middlebury College Department of Chemistry and Biochemistry, Middlebury VT 05753, e-mail: avasiliou@middlebury.edu

---

|                                                                      |          |
|----------------------------------------------------------------------|----------|
| Precursor TPES and dissociative photoionization                      | S2 – S3  |
| Potential energy surface                                             | S4       |
| Calculated Geometries and Vibrations of several molecules and states | S5 – S11 |
| Notes and References                                                 | S11      |

## Precursor TPES and dissociative photoionization

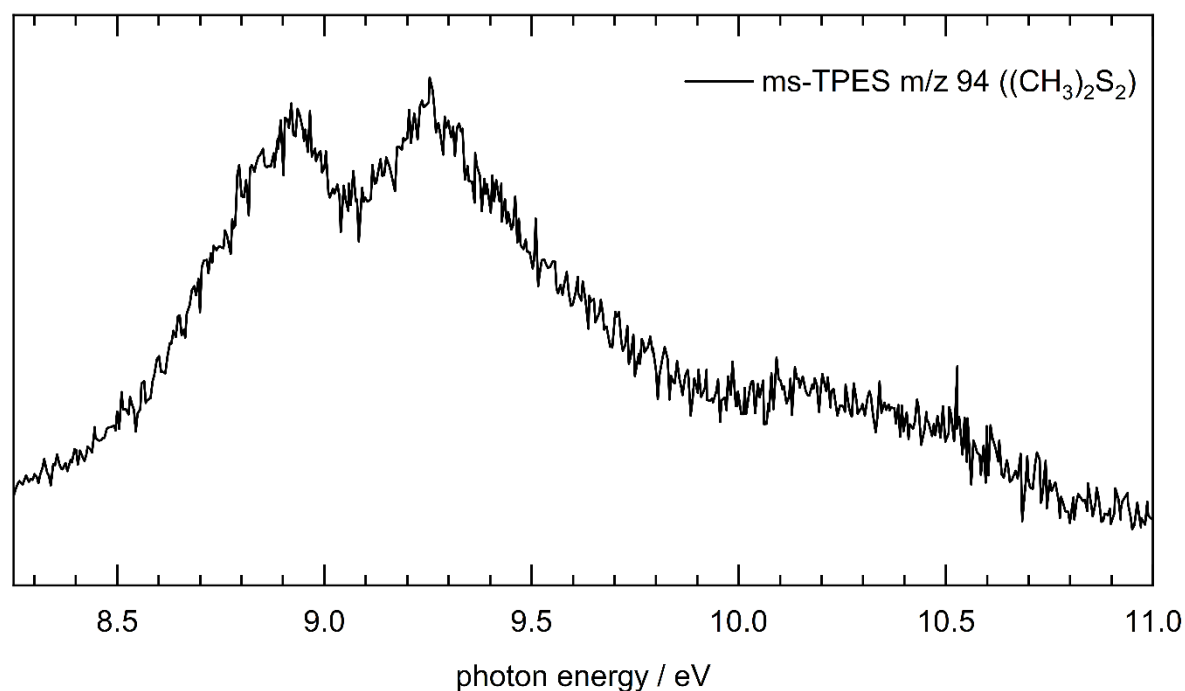

Figure S1: ms-TPES of the precursor  $m/z$  94 from 8.25 – 11.0 eV. A He(I) photoelectron spectrum was first published by Kimura *et al.* in 1980 with an IE of 8.3 eV. In 1993 Li *et al.* published a more precise IE of  $8.18 \pm 0.03$  eV through photoionization efficiency curves. A first TPE spectrum was published by Chiang *et al.* in 1999.<sup>[2-5]</sup>

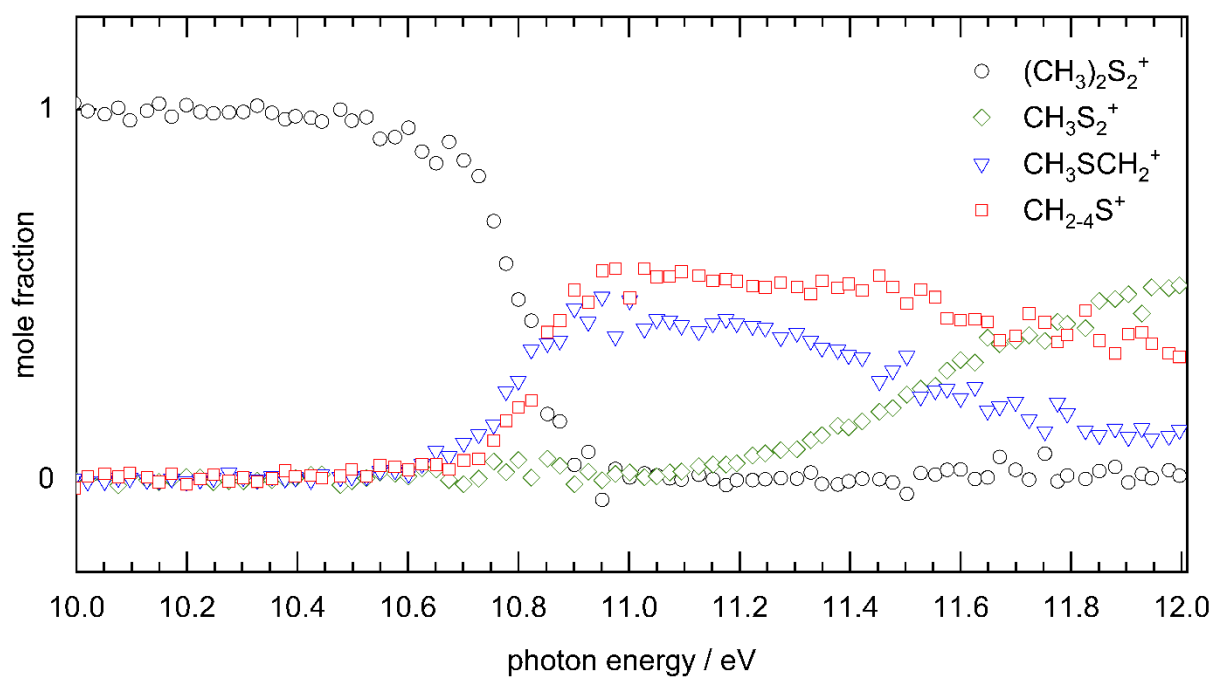

Figure S2: Breakdown diagram of the dissociative photoionization of the precursor  $(\text{CH}_3)_2\text{S}_2$  to  $\text{CH}_3\text{S}_2^+$ ,  $\text{CH}_3\text{SCH}_2^+$  and  $\text{CH}_2\text{-}_4\text{S}^+$ . It is in agreement with the data from Hrodmarsson *et al.*<sup>[1]</sup>

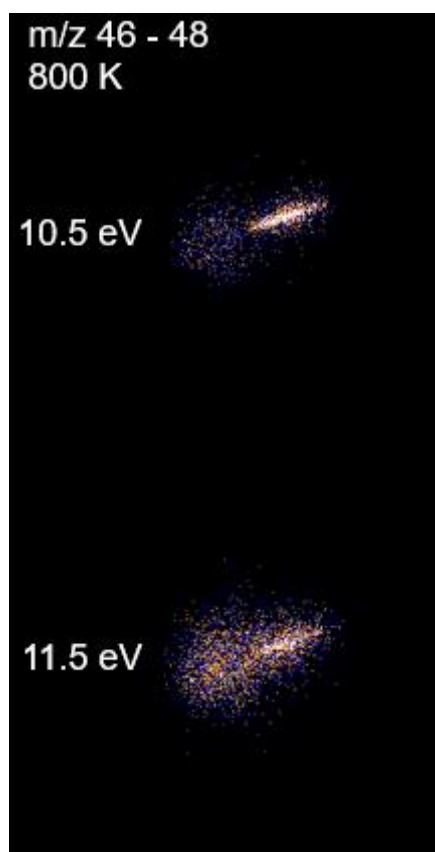

Figure S3: Ion velocity map images (VMI) of  $m/z$  46 – 48 ( $\text{CH}_2\text{S}^+$ ,  $\text{CH}_3\text{S}^+$ ,  $\text{CH}_3\text{SH}^+$ ) at 800 K. The signal at 10.5 eV results from direct photoionization of the pyrolysis products and is not affected by dissociative photoionization (DPI). Even at 11.5 eV DPI only contributes to a lower extent to these mass channels, as evident from the small signals at high kinetic energy release..

## Potential energy surface

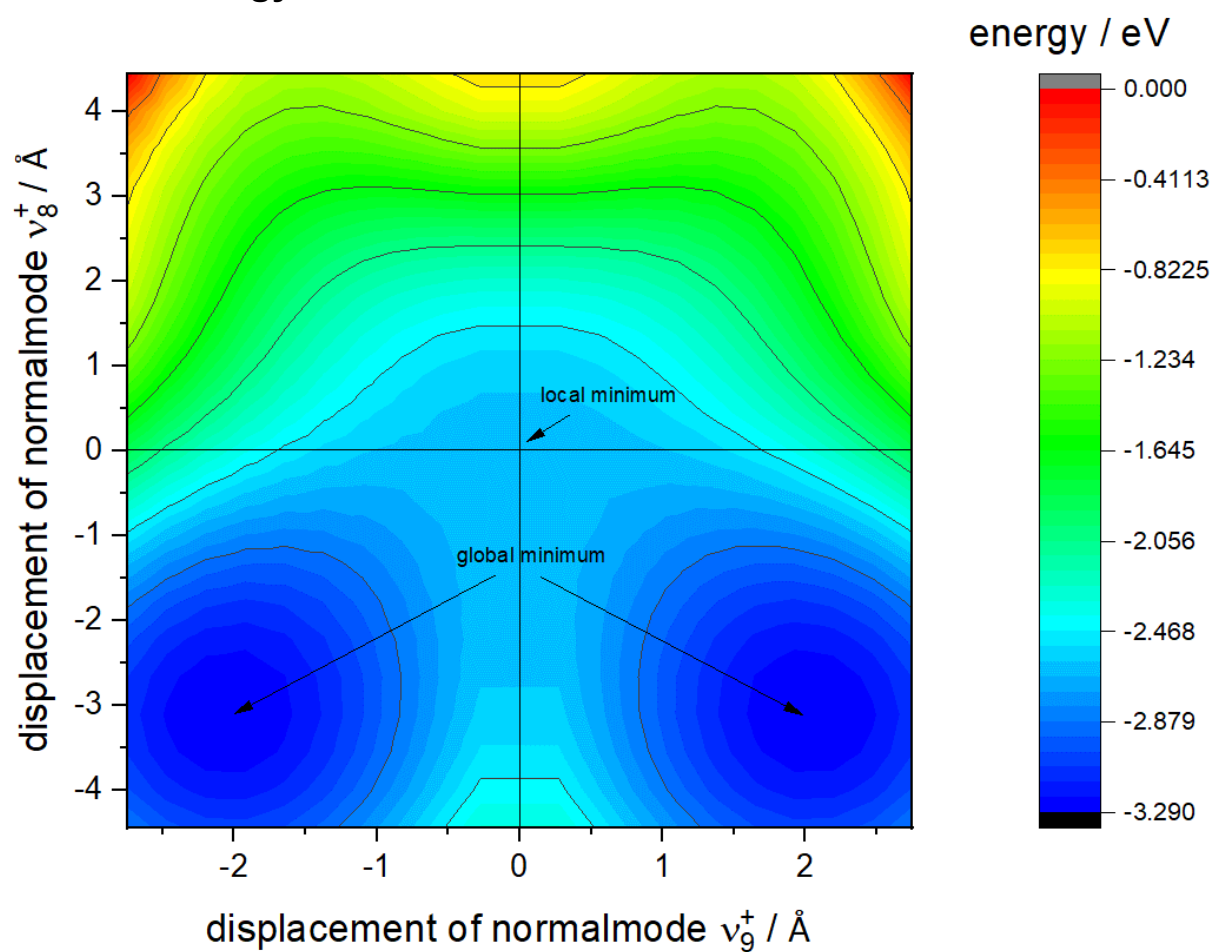

Figure S4: Scan of the displacements of normal modes  $v_8^+$  and  $v_9^+$ . The local minimum in the middle corresponds to the structure  $\text{CH}_2\text{HS}$ , where the hydrogen sits above the C-S bond. The global minimum corresponds to the mercaptomethyl radical cation  $\text{CH}_2\text{SH}^+$ . A combination of  $v_8^+$  and  $v_9^+$  leads barrierless to the global minimum. Hence the ZPE should be sufficient to transfer the local minimum to the global one.

## Calculated Ionization Energies, Geometries and Vibrations of several molecules and states

Table 1: Adiabatic Ionization energies using different composite methods

|                                                                                   | <b>CBS-QB3</b> | <b>G4</b> | <b>W1BD</b> |
|-----------------------------------------------------------------------------------|----------------|-----------|-------------|
| CH <sub>2</sub> SH X <sup>+</sup> 2B <sub>2</sub> ← X <sup>1</sup> A <sub>1</sub> | 7.50           | 7.52      | 7.57        |
| CH <sub>3</sub> S X <sup>+</sup> 3A'' ← X <sup>2</sup> A'                         | 9.23           | 9.26      | 9.37        |
| CH <sub>3</sub> S <sub>2</sub> X <sup>+</sup> 1A' ← X <sup>2</sup> A'             | 8.61           | 8.60      | 8.61        |
| CH <sub>3</sub> S <sub>2</sub> X <sup>+</sup> 3A'' ← X <sup>2</sup> A'            | 9.18           | 9.21      | 9.20        |
| S <sub>2</sub> H X <sup>+</sup> 1A' ← X <sup>2</sup> A''                          | 9.22           | 9.22      | 9.26        |
| S <sub>2</sub> H a <sup>+</sup> 3A'' ← X <sup>2</sup> A''                         | 9.59           | 9.61      | 9.62        |
| CH <sub>3</sub> SH X <sup>+</sup> 2A'' ← X <sup>1</sup> A'                        | 9.45           | 9.44      | 9.45        |
| CH <sub>2</sub> S X <sup>+</sup> 2B <sub>2</sub> ← X <sup>1</sup> A <sub>1</sub>  | 9.35           | 9.38      | 9.39        |

### CH<sub>3</sub>S<sub>2</sub>:

Table 2: Cartesian Coordinates in Å of CH<sub>3</sub>S<sub>2</sub> in its X<sup>2</sup>A'' state

| Atom | X         | Y         | Z         |
|------|-----------|-----------|-----------|
| S    | -2.159822 | -0.276096 | -0.007522 |
| S    | -0.209972 | -0.177077 | 0.003536  |
| C    | 0.362540  | -1.894386 | 0.000573  |
| H    | -0.003027 | -2.396821 | -0.891238 |
| H    | 1.451319  | -1.874561 | -0.000423 |
| H    | -0.001234 | -2.399696 | 0.891529  |

Table 3: Vibrations of CH<sub>3</sub>S<sub>2</sub> in its X<sup>2</sup>A'' state

| Vibration       | Wavenumbers | Description                           |
|-----------------|-------------|---------------------------------------|
| v <sub>1</sub>  | 3180        | Asymmetric CH <sub>2</sub> stretching |
| v <sub>2</sub>  | 3170        | Asymmetric CH <sub>3</sub> stretching |
| v <sub>3</sub>  | 3070        | Symmetric CH <sub>3</sub> stretching  |
| v <sub>4</sub>  | 1470        | Symmetric CH <sub>3</sub> scissoring  |
| v <sub>5</sub>  | 1460        | Asymmetric CH <sub>3</sub> scissoring |
| v <sub>6</sub>  | 1350        | CH <sub>3</sub> umbrella              |
| v <sub>7</sub>  | 980         | CH <sub>3</sub> wagging               |
| v <sub>8</sub>  | 940         | CH <sub>3</sub> wagging               |
| v <sub>9</sub>  | 720         | S-C stretching                        |
| v <sub>10</sub> | 630         | S-S stretching                        |
| v <sub>11</sub> | 260         | S-S-C bending                         |
| v <sub>12</sub> | 110         | CH <sub>3</sub> rotation              |

Table 4: Cartesian Coordinates in Å of CH<sub>3</sub>S<sub>2</sub> in its X<sup>+</sup>1A' state

| Atom | X          | Y          | Z         |
|------|------------|------------|-----------|
| S    | -1.3135640 | 0.2813330  | 0.0014720 |
| S    | 0.3174530  | -0.6257030 | 0.0014150 |

|   |           |            |            |
|---|-----------|------------|------------|
| C | 1.6829900 | 1.1044050  | 0.0044360  |
| H | 1.6529960 | 0.0478250  | 0.9380430  |
| H | 2.5923900 | -0.0478250 | -0.0970400 |
| H | 1.5944490 | 1.1933440  | -0.8667160 |

Table 5: Vibrations of CH<sub>3</sub>S<sub>2</sub> in its X<sup>+</sup> 1A' state

| Vibration       | Wavenumbers | Description                           |
|-----------------|-------------|---------------------------------------|
| v <sub>1</sub>  | 3180        | Asymmetric CH <sub>2</sub> stretching |
| v <sub>2</sub>  | 3090        | Asymmetric CH <sub>3</sub> stretching |
| v <sub>3</sub>  | 3010        | Symmetric CH <sub>3</sub> stretching  |
| v <sub>4</sub>  | 1410        | Symmetric CH <sub>3</sub> scissoring  |
| v <sub>5</sub>  | 1400        | Asymmetric CH <sub>3</sub> scissoring |
| v <sub>6</sub>  | 1320        | CH <sub>3</sub> umbrella              |
| v <sub>7</sub>  | 970         | CH <sub>3</sub> wagging               |
| v <sub>8</sub>  | 840         | CH <sub>3</sub> wagging               |
| v <sub>9</sub>  | 740         | S-S stretching                        |
| v <sub>10</sub> | 630         | S-C stretching                        |
| v <sub>11</sub> | 280         | S-S-C bending                         |
| v <sub>12</sub> | 100         | CH <sub>3</sub> rotation              |

Table 6: Cartesian Coordinates in Å of CH<sub>3</sub>S<sub>2</sub> in its a<sup>+</sup> 3A" state

| Atom | X          | Y          | Z          |
|------|------------|------------|------------|
| S    | -2.1382510 | -0.2826630 | -0.0121410 |
| S    | -0.2012290 | -0.1708750 | 0.0081810  |
| C    | 0.3531130  | -1.9208630 | 0.0009940  |
| H    | -0.0097300 | -2.4006500 | -0.9037830 |
| H    | 1.4384240  | -1.8388600 | -0.0033140 |
| H    | -0.0025240 | -2.4047270 | 0.9065200  |

Table 7: Vibrations of CH<sub>3</sub>S<sub>2</sub> in its a<sup>+</sup> 3A" state

| Vibration       | Wavenumbers | Description                           |
|-----------------|-------------|---------------------------------------|
| v <sub>1</sub>  | 3210        | Asymmetric CH <sub>2</sub> stretching |
| v <sub>2</sub>  | 3200        | Asymmetric CH <sub>3</sub> stretching |
| v <sub>3</sub>  | 3080        | Symmetric CH <sub>3</sub> stretching  |
| v <sub>4</sub>  | 1450        | Symmetric CH <sub>3</sub> scissoring  |
| v <sub>5</sub>  | 1440        | Asymmetric CH <sub>3</sub> scissoring |
| v <sub>6</sub>  | 1350        | CH <sub>3</sub> umbrella              |
| v <sub>7</sub>  | 980         | CH <sub>3</sub> wagging               |
| v <sub>8</sub>  | 940         | CH <sub>3</sub> wagging               |
| v <sub>9</sub>  | 630         | S-S stretching                        |
| v <sub>10</sub> | 620         | S-C stretching                        |
| v <sub>11</sub> | 210         | S-S-C bending                         |
| v <sub>12</sub> | 110         | CH <sub>3</sub> rotation              |

Table 8: Cartesian Coordinates in Å of CH<sub>3</sub>S<sub>2</sub> in its A<sup>+</sup> 1A" state

| Atom | X          | Y          | Z          |
|------|------------|------------|------------|
| S    | -2.0457850 | -0.2041220 | 0.3990820  |
| S    | -0.2906470 | -0.2330680 | -0.3910150 |
| C    | 0.3464640  | -1.9327200 | -0.0526110 |

|   |            |            |            |
|---|------------|------------|------------|
| H | -0.3159580 | -2.6525510 | -0.5265220 |
| H | 1.3287270  | -1.9182640 | -0.5217420 |
| H | 0.4162220  | -2.0680250 | 1.0233740  |

Table 9: Vibrations of CH<sub>3</sub>S<sub>2</sub> in its A<sup>+</sup> 1A" state

| Vibration       | Wavenumbers | Description                           |
|-----------------|-------------|---------------------------------------|
| v <sub>1</sub>  | 3210        | Asymmetric CH <sub>2</sub> stretching |
| v <sub>2</sub>  | 3200        | Asymmetric CH <sub>3</sub> stretching |
| v <sub>3</sub>  | 3080        | Symmetric CH <sub>3</sub> stretching  |
| v <sub>4</sub>  | 1450        | Symmetric CH <sub>3</sub> scissoring  |
| v <sub>5</sub>  | 1440        | Asymmetric CH <sub>3</sub> scissoring |
| v <sub>6</sub>  | 1330        | CH <sub>3</sub> umbrella              |
| v <sub>7</sub>  | 960         | CH <sub>3</sub> wagging               |
| v <sub>8</sub>  | 940         | CH <sub>3</sub> wagging               |
| v <sub>9</sub>  | 670         | S-S stretching                        |
| v <sub>10</sub> | 590         | S-C stretching                        |
| v <sub>11</sub> | 210         | S-S-C bending                         |
| v <sub>12</sub> | 70          | CH <sub>3</sub> rotation              |

HS<sub>2</sub>: CCSD(T)/cc-pVTZ and ωB97x-D3/cc-pVTZ for the excited state

Table 10: Cartesian Coordinates in Å of HS<sub>2</sub> in its X<sup>2</sup>A" state

| Atom | X          | Y          | Z          |
|------|------------|------------|------------|
| S    | -1.6204750 | 0.1664060  | -0.0030270 |
| S    | 0.3608730  | -0.0437240 | 0.0043110  |
| H    | 0.7565250  | 1.2476990  | -0.0407860 |

Table 11: Vibrations of HS<sub>2</sub> in its X<sup>2</sup>A" state

| Vibration      | Wavenumbers | Description    |
|----------------|-------------|----------------|
| v <sub>1</sub> | 2580        | S-H stretching |
| v <sub>2</sub> | 900         | S-S-C bending  |
| v <sub>3</sub> | 590         | S-S stretching |

Table 12: Cartesian Coordinates in Å of HS<sub>2</sub> in its X<sup>+</sup> 1A' state

| Atom | X          | Y          | Z          |
|------|------------|------------|------------|
| S    | -1.5770390 | 0.1668720  | -0.0030430 |
| S    | 0.3186390  | -0.0456680 | 0.0043790  |
| H    | 0.7553230  | 1.2491750  | -0.0408380 |

Table 13: Vibrations of HS<sub>2</sub> in its X<sup>+</sup> 1A' state

| Vibration      | Wavenumbers | Description    |
|----------------|-------------|----------------|
| v <sub>1</sub> | 2520        | S-H stretching |
| v <sub>2</sub> | 940         | S-S-C bending  |
| v <sub>3</sub> | 680         | S-S stretching |

Table 14: Cartesian Coordinates in Å of HS<sub>2</sub> in its a<sup>+</sup> <sup>3</sup>A" state

| Atom | X          | Y          | Z          |
|------|------------|------------|------------|
| S    | -1.5772880 | 0.2083990  | -0.0044930 |
| S    | 0.3877440  | -0.0826400 | 0.0056700  |
| H    | 0.6864660  | 1.2446210  | -0.0406790 |

Table 15: Vibrations of HS<sub>2</sub> in its a<sup>+</sup> <sup>3</sup>A" state

| Vibration      | Wavenumbers | Description    |
|----------------|-------------|----------------|
| v <sub>1</sub> | 2570        | S-H stretching |
| v <sub>2</sub> | 760         | S-S-C bending  |
| v <sub>3</sub> | 600         | S-S stretching |

Table 16: Cartesian Coordinates in Å of HS<sub>2</sub> in its a<sup>+</sup> <sup>3</sup>A" state

| Atom | X          | Y          | Z          |
|------|------------|------------|------------|
| S    | -1.5614070 | 0.2042800  | -0.0043490 |
| S    | 0.3595040  | -0.0780490 | 0.0055100  |
| H    | 0.6988250  | 1.2441490  | -0.0406630 |

Table 17: Vibrations of HS<sub>2</sub> in its a<sup>+</sup> <sup>3</sup>A" state

| Vibration      | Wavenumbers | Description    |
|----------------|-------------|----------------|
| v <sub>1</sub> | 2550        | S-H stretching |
| v <sub>2</sub> | 800         | S-S-C bending  |
| v <sub>3</sub> | 660         | S-S stretching |

### CH<sub>4</sub>S:

Table 18: Cartesian Coordinates in Å of CH<sub>4</sub>S in its X <sup>1</sup>A' state

| Atom | X         | Y         | Z         |
|------|-----------|-----------|-----------|
| S    | -2.584560 | 0.636421  | 0.000824  |
| H    | -2.833893 | 1.952225  | 0.001295  |
| C    | -0.775553 | 0.743816  | 0.000178  |
| H    | -0.408946 | -0.280115 | -0.000419 |
| H    | -0.407936 | 1.244273  | -0.891748 |
| H    | -0.407243 | 1.243477  | 0.892264  |

Table 19: Vibrations of CH<sub>4</sub>S in its X <sup>1</sup>A' state

| Vibration      | Wavenumbers | Description                             |
|----------------|-------------|-----------------------------------------|
| v <sub>1</sub> | 3170        | Asymmetric CH <sub>3</sub> stretching   |
| v <sub>2</sub> | 3170        | Asymmetric CH <sub>2</sub> stretching   |
| v <sub>3</sub> | 3080        | Symmetric CH <sub>3</sub> stretching    |
| v <sub>4</sub> | 2750        | S-H stretching                          |
| v <sub>5</sub> | 1490        | Asymmetric CH <sub>3</sub> scissoring   |
| v <sub>6</sub> | 1480        | Asymmetric CH <sub>3</sub> scissoring   |
| v <sub>7</sub> | 1370        | CH <sub>3</sub> umbrella                |
| v <sub>8</sub> | 1100        | H-S-C bending + CH <sub>3</sub> wagging |



|            |     |                         |
|------------|-----|-------------------------|
| $\nu_9$    | 980 | CH <sub>3</sub> wagging |
| $\nu_{10}$ | 810 | H-S-C bending           |
| $\nu_{11}$ | 740 | S-C stretching          |
| $\nu_{12}$ | 230 | H-S-C-H dihedral        |

Table 20: Cartesian Coordinates in Å of CH<sub>4</sub>S in its X<sup>+</sup> 2A" state

| Atom | X        | Y        | Z        |
|------|----------|----------|----------|
| S    | -2.54409 | 0.63636  | 0.00116  |
| H    | -2.8058  | 1.96536  | 0.00086  |
| C    | -0.77489 | 0.71303  | 0.00022  |
| H    | -0.39463 | -0.30440 | -0.00061 |
| H    | -0.44987 | 1.26542  | -0.88753 |
| H    | -0.44886 | 1.26434  | 0.88829  |

Table 21: Vibrations of CH<sub>4</sub>S in its X<sup>+</sup> 2A" state

| Vibration  | Wavenumbers | Description                             |
|------------|-------------|-----------------------------------------|
| $\nu_1$    | 3200        | Asymmetric CH <sub>3</sub> stretching   |
| $\nu_2$    | 3100        | Asymmetric CH <sub>2</sub> stretching   |
| $\nu_3$    | 3030        | Symmetric CH <sub>3</sub> stretching    |
| $\nu_4$    | 2660        | S-H stretching                          |
| $\nu_5$    | 1440        | Asymmetric CH <sub>3</sub> scissoring   |
| $\nu_6$    | 1420        | Asymmetric CH <sub>3</sub> scissoring   |
| $\nu_7$    | 1330        | CH <sub>3</sub> umbrella                |
| $\nu_8$    | 1110        | H-S-C bending + CH <sub>3</sub> wagging |
| $\nu_9$    | 840         | CH <sub>3</sub> wagging                 |
| $\nu_{10}$ | 810         | H-S-C bending                           |
| $\nu_{11}$ | 720         | S-C stretching                          |
| $\nu_{12}$ | 250         | H-S-C-H dihedral                        |

### CH<sub>3</sub>S:

Table 22: Cartesian Coordinates in Å of CH<sub>3</sub>S in its X<sup>+</sup> 2A' state

| Atom | X        | Y        | Z        |
|------|----------|----------|----------|
| S    | -2.38120 | 0.80604  | 1.47306  |
| C    | -2.92689 | -0.04700 | -0.00082 |
| H    | -2.60388 | -1.08583 | -0.00891 |
| H    | -2.60384 | 0.46735  | -0.90354 |
| H    | -4.02025 | -0.03315 | 0.01992  |

Table 23: Vibrations of CH<sub>3</sub>S in its X<sup>+</sup> 2A' state

| Vibration | Wavenumbers | Description                           |
|-----------|-------------|---------------------------------------|
| $\nu_1$   | 3150        | Asymmetric CH <sub>2</sub> stretching |
| $\nu_2$   | 3130        | Asymmetric CH <sub>3</sub> stretching |
| $\nu_3$   | 3050        | Symmetric CH <sub>3</sub> stretching  |
| $\nu_4$   | 1480        | Symmetric CH <sub>3</sub> scissoring  |
| $\nu_5$   | 1380        | Aymmetric CH <sub>3</sub> scissoring  |
| $\nu_6$   | 1350        | CH <sub>3</sub> umbrella              |

|         |     |                         |
|---------|-----|-------------------------|
| $\nu_7$ | 880 | CH <sub>3</sub> wagging |
| $\nu_8$ | 750 | S-C stretching          |
| $\nu_9$ | 440 | CH <sub>3</sub> wagging |

Table 24: Cartesian Coordinates in Å of CH<sub>3</sub>S in its X<sup>+</sup> <sup>3</sup>A<sub>2</sub> state

| Atom | X        | Y        | Z        |
|------|----------|----------|----------|
| S    | -2.37421 | 0.77506  | 1.42153  |
| C    | -2.95144 | -0.04083 | 0.00767  |
| H    | -2.58069 | -1.07385 | 0.01659  |
| H    | -2.58065 | 0.48299  | -0.88267 |
| H    | -4.04906 | -0.03595 | 0.0166   |

Table 25: Vibrations of CH<sub>3</sub>S in its X<sup>+</sup> <sup>3</sup>A<sub>2</sub> state

| Vibration | Wavenumbers | Description                           |
|-----------|-------------|---------------------------------------|
| $\nu_1$   | 3080        | Asymmetric CH <sub>2</sub> stretching |
| $\nu_2$   | 3080        | Asymmetric CH <sub>3</sub> stretching |
| $\nu_3$   | 2980        | Symmetric CH <sub>3</sub> stretching  |
| $\nu_4$   | 1360        | Asymmetric CH <sub>3</sub> scissoring |
| $\nu_5$   | 1350        | Symmetric CH <sub>3</sub> scissoring  |
| $\nu_6$   | 1320        | CH <sub>3</sub> umbrella              |
| $\nu_7$   | 830         | CH <sub>3</sub> wagging               |
| $\nu_8$   | 820         | CH <sub>3</sub> wagging               |
| $\nu_9$   | 780         | S-C stretching                        |

Table 26: Cartesian Coordinates in Å of CH<sub>3</sub>S in its b<sup>+</sup> <sup>1</sup>A<sub>1</sub> state.

| Atom | X       | Y        | Z        |
|------|---------|----------|----------|
| S    | 0.77331 | 0.01549  | -0.00037 |
| C    | 2.48722 | 0.03294  | 0.00004  |
| H    | 2.84044 | -1.01556 | -0.00157 |
| H    | 2.86290 | 0.54186  | -0.89882 |
| H    | 2.86250 | 0.53890  | 0.90073  |

Table 27: Vibrations of CH<sub>3</sub>S in its b<sup>+</sup> <sup>1</sup>A<sub>1</sub> state.

| Vibration | Wavenumbers | Description                           |
|-----------|-------------|---------------------------------------|
| $\nu_1$   | 3110        | Asymmetric CH <sub>2</sub> stretching |
| $\nu_2$   | 3050        | Asymmetric CH <sub>3</sub> stretching |
| $\nu_3$   | 2950        | Symmetric CH <sub>3</sub> stretching  |
| $\nu_4$   | 1370        | Asymmetric CH <sub>3</sub> scissoring |
| $\nu_5$   | 1330        | Symmetric CH <sub>3</sub> scissoring  |
| $\nu_6$   | 1330        | CH <sub>3</sub> umbrella              |
| $\nu_7$   | 890         | CH <sub>3</sub> wagging               |
| $\nu_8$   | 890         | CH <sub>3</sub> wagging               |
| $\nu_9$   | 810         | S-C stretching                        |

Table 28: Cartesian Coordinates in Å of CH<sub>2</sub>S in its X <sup>1</sup>A<sub>1</sub> state

| Atom | X        | Y       | Z        |
|------|----------|---------|----------|
| S    | -1.59438 | 1.51332 | -0.00005 |
| C    | -3.1946  | 1.51578 | 0.00003  |
| H    | -3.7726  | 0.59521 | -0.03211 |
| H    | -3.76982 | 2.43809 | 0.03224  |

Table 29: Vibrations of CH<sub>2</sub>S in its X <sup>1</sup>A<sub>1</sub> state

| Vibration      | Wavenumbers | Description                           |
|----------------|-------------|---------------------------------------|
| v <sub>1</sub> | 3190        | Asymmetric CH <sub>2</sub> stretching |
| v <sub>2</sub> | 3100        | Symmetric CH <sub>2</sub> stretching  |
| v <sub>3</sub> | 1510        | Symmetric H-C-H bending               |
| v <sub>4</sub> | 1130        | S-C stretching                        |
| v <sub>5</sub> | 1060        | CH <sub>2</sub> out-of-plane bending  |
| v <sub>6</sub> | 1010        | Asymmetric S-C-H bending              |

Table 30: Cartesian Coordinates in Å of CH<sub>2</sub>S in its X<sup>+</sup> <sup>2</sup>B<sub>2</sub> state

| Atom | X        | Y       | Z        |
|------|----------|---------|----------|
| S    | -1.61405 | 1.51346 | -0.00005 |
| C    | -3.19833 | 1.51569 | 0.00002  |
| H    | -3.76106 | 0.57883 | -0.03268 |
| H    | -3.75796 | 2.45443 | 0.03282  |

Table 31: Vibrations of CH<sub>2</sub>S in its X<sup>+</sup> <sup>2</sup>B<sub>2</sub> state

| Vibration      | Wavenumbers | Description                           |
|----------------|-------------|---------------------------------------|
| v <sub>1</sub> | 3160        | Asymmetric CH <sub>2</sub> stretching |
| v <sub>2</sub> | 3060        | Symmetric CH <sub>2</sub> stretching  |
| v <sub>3</sub> | 1390        | Symmetric H-C-H bending               |
| v <sub>4</sub> | 1100        | S-C stretching                        |
| v <sub>5</sub> | 1020        | CH <sub>2</sub> out-of-plane bending  |
| v <sub>6</sub> | 770         | Asymmetric S-C-H bending              |

## Notes and references

[1]: H. R. Hrodmarsson, G. A. Garcia, L. Nahon, J.-C. Loison and B. Gans, *J. Mol. Spectrosc.*, 2021, **381**, 111533.

[2]: W. Li, S. Chiu, Z. Ma, C. Liao and C. Y. Ng, *The Journal of Chemical Physics*, 1993, **99**, 8440–8444.

[3]: J. J. Butler, T. Baer and S. A. Evans Jr, *Journal of the American Chemical Society*, 1983, **105**, 3451–3455.

[4]: S.-Y. Chiang, C.-I. Ma and D.-J. Shr, *The Journal of Chemical Physics*, 1999, **110**, 9056–9063.

[5]: K. Kimura, *Handbook of HeI photoelectron spectra of fundamental organic molecules*, Japan Scientific Society Press, 1981.
